# Supplementary material for: Phenotypic Variability and Differences in the Drought Response of Norway Spruce Pendula and Pyramidalis Half-Sib Families
Source: MDPI journal article supplement (doi:10.3390/f12070947), 2021-07-19

## SUPPLEMENTARY DATA

### Phenotypic Variability and Differences in the Drought Response of Norway Spruce *Pendula* and *Pyramidalis* Half-sib Families

Marius BUDEANU, Ecaterina Nicoleta APOSTOL, Emanuel BESLIU, Vlad Emil CRIȘAN, Any Mary PETRITAN

**Figure S1.** Duncan's test for ring width (RW) and earlywood (EW) at the family level. Homogeneous groups (H. g.) for 5% transgression probability ( $\alpha$ ). Affiliation of families (1-24 = *pendula*; 25-48 = *pyramidalis*) to provenances: 1-3 and 25-27= provenance 1; 4-6 and 28-30= prov. 2; 7-9 and 31-33= prov. 3; 10-12 and 34-36= prov. 4; 13-15 and 37-39= prov. 5; 16-18 and 40-42= prov. 6; 19-21 and 43-45= prov. 7; 22-24 and 46-48= prov. 8.

| Family RW (mm) |       |   | H.g. ( $\alpha = 5\%$ ) | Family EW (mm) |       |   | H.g. ( $\alpha = 5\%$ ) |
|----------------|-------|---|-------------------------|----------------|-------|---|-------------------------|
| 31             | 6.094 | * |                         | 31             | 4.988 | * |                         |
| 6              | 5.451 | * | *                       | 28             | 4.649 | * | *                       |
| 28             | 5.451 | * | *                       | 35             | 4.518 | * | *                       |
| 35             | 5.372 | * | *                       | 6              | 4.418 | * | *                       |
| 3              | 5.341 | * | *                       | 7              | 4.261 | * | *                       |
| 11             | 5.137 | * | *                       | 16             | 4.226 | * | *                       |
| 32             | 5.094 | * | *                       | 8              | 4.212 | * | *                       |
| 8              | 5.045 | * | *                       | 11             | 4.181 | * | *                       |
| 16             | 5.032 | * | *                       | 29             | 4.128 | * | *                       |
| 7              | 4.983 | * | *                       | 32             | 4.120 | * | *                       |
| 30             | 4.980 | * | *                       | 30             | 4.047 | * | *                       |
| 33             | 4.974 | * | *                       | 42             | 4.015 | * | *                       |
| 44             | 4.909 | * | *                       | 33             | 3.999 | * | *                       |
| 29             | 4.835 | * | *                       | 10             | 3.963 | * | *                       |
| 42             | 4.789 | * | *                       | 21             | 3.896 | * | *                       |
| 21             | 4.781 | * | *                       | 48             | 3.886 | * | *                       |
| 48             | 4.764 | * | *                       | 22             | 3.810 | * | *                       |
| 19             | 4.672 | * | *                       | 43             | 3.783 | * | *                       |
| 26             | 4.642 | * | *                       | 44             | 3.780 | * | *                       |
| 22             | 4.602 | * | *                       | 20             | 3.773 | * | *                       |
| 1              | 4.590 | * | *                       | 26             | 3.773 | * | *                       |
| 18             | 4.585 | * | *                       | 40             | 3.766 | * | *                       |
| 10             | 4.582 | * | *                       | 3              | 3.718 | * | *                       |
| 24             | 4.523 | * | *                       | 47             | 3.677 | * | *                       |
| 20             | 4.520 | * | *                       | 15             | 3.662 | * | *                       |
| 39             | 4.508 | * | *                       | 5              | 3.645 | * | *                       |
| 43             | 4.438 | * | *                       | 36             | 3.642 | * | *                       |
| 40             | 4.432 | * | *                       | 12             | 3.625 | * | *                       |
| 38             | 4.425 | * | *                       | 24             | 3.563 | * | *                       |
| 36             | 4.368 | * | *                       | 19             | 3.556 | * | *                       |
| 47             | 4.353 | * | *                       | 18             | 3.544 | * | *                       |
| 12             | 4.351 | * | *                       | 4              | 3.527 | * | *                       |
| 4              | 4.305 | * | *                       | 1              | 3.511 | * | *                       |
| 5              | 4.298 | * | *                       | 23             | 3.489 | * | *                       |
| 2              | 4.293 | * | *                       | 9              | 3.471 | * | *                       |
| 15             | 4.270 | * | *                       | 17             | 3.440 | * | *                       |
| 23             | 4.214 | * | *                       | 13             | 3.440 | * | *                       |
| 17             | 4.181 | * | *                       | 25             | 3.427 | * | *                       |
| 9              | 4.109 | * | *                       | 39             | 3.419 | * | *                       |
| 13             | 4.095 | * | *                       | 2              | 3.365 | * | *                       |
| 25             | 4.093 | * | *                       | 14             | 3.292 | * | *                       |
| 14             | 3.971 | * | *                       | 41             | 3.286 | * | *                       |
| 41             | 3.835 | * | *                       | 38             | 3.261 | * | *                       |
| 46             | 3.630 | * | *                       | 34             | 2.960 | * | *                       |
| 34             | 3.602 | * | *                       | 46             | 2.946 | * | *                       |
| 27             | 3.577 | * | *                       | 45             | 2.916 | * | *                       |
| 45             | 3.454 | * | *                       | 27             | 2.905 | * | *                       |
| 37             | 3.256 | * | *                       | 37             | 2.821 | * | *                       |

**Figure S2.** Duncan's test for latewood (LW) and latewood proportion (LWP) at the family level. Homogeneous groups (H. g.) for 5% transgression probability ( $\alpha$ ). Affiliation of families (1-24 = *pendula*; 25-48 = *pyramidalis*) to provenances as in figure S1.

| Family | LW (mm) | H.g. ( $\alpha = 5\%$ ) | Family | LWP (%) | H.g. ( $\alpha = 5\%$ ) |
|--------|---------|-------------------------|--------|---------|-------------------------|
| 3      | 1.624   | *                       | 3      | 29.7    | *                       |
| 38     | 1.164   | *                       | 38     | 26.3    | * *                     |
| 44     | 1.130   | * *                     | 1      | 24.8    | * * *                   |
| 19     | 1.116   | * * *                   | 39     | 24.4    | * * * *                 |
| 31     | 1.106   | * * * *                 | 19     | 23.9    | * * * * *               |
| 39     | 1.090   | * * * * *               | 18     | 22.8    | * * * * *               |
| 1      | 1.079   | * * * * * *             | 44     | 22.7    | * * * * *               |
| 18     | 1.041   | * * * * * *             | 2      | 21.6    | * * * * * *             |
| 6      | 1.033   | * * * * * *             | 24     | 21.4    | * * * * * *             |
| 33     | 0.976   | * * * * * *             | 33     | 19.6    | * * * * * *             |
| 32     | 0.974   | * * * * * *             | 21     | 19.5    | * * * * * *             |
| 24     | 0.960   | * * * * * *             | 46     | 19.1    | * * * * * *             |
| 11     | 0.956   | * * * * * *             | 6      | 19.0    | * * * * * *             |
| 30     | 0.933   | * * * * * *             | 27     | 18.9    | * * * * * *             |
| 2      | 0.928   | * * * * * *             | 32     | 18.9    | * * * * * *             |
| 21     | 0.886   | * * * * * *             | 26     | 18.9    | * * * * * *             |
| 48     | 0.878   | * * * * * *             | 30     | 18.7    | * * * * * *             |
| 26     | 0.870   | * * * * * *             | 11     | 18.6    | * * * * * *             |
| 35     | 0.855   | * * * * * *             | 48     | 18.5    | * * * * * *             |
| 8      | 0.833   | * * * * * *             | 31     | 18.3    | * * * * * *             |
| 16     | 0.807   | * * * * * *             | 4      | 18.0    | * * * * * *             |
| 28     | 0.802   | * * * * * *             | 34     | 17.9    | * * * * * *             |
| 22     | 0.791   | * * * * * *             | 17     | 17.7    | * * * * * *             |
| 4      | 0.779   | * * * * * *             | 22     | 17.6    | * * * * * *             |
| 42     | 0.775   | * * * * * *             | 23     | 17.2    | * * * * * *             |
| 20     | 0.748   | * * * * * *             | 14     | 17.2    | * * * * * *             |
| 17     | 0.741   | * * * * * *             | 36     | 17.1    | * * * * *               |
| 12     | 0.726   | * * * * * *             | 12     | 16.8    | * * * * *               |
| 36     | 0.726   | * * * * * *             | 8      | 16.7    | * * * * *               |
| 23     | 0.725   | * * * * * *             | 20     | 16.6    | * * * * *               |
| 7      | 0.722   | * * * * * *             | 25     | 16.4    | * * * * *               |
| 29     | 0.707   | * * * * * *             | 42     | 16.2    | * * * * *               |
| 46     | 0.684   | * * * * * *             | 16     | 16.1    | * * * * *               |
| 14     | 0.679   | * * * * * *             | 13     | 16.0    | * * * * *               |
| 47     | 0.676   | * * * * * *             | 35     | 16.0    | * * * * *               |
| 27     | 0.673   | * * * * * *             | 45     | 15.7    | * * * *                 |
| 40     | 0.667   | * * * * * *             | 9      | 15.6    | * * * *                 |
| 25     | 0.667   | * * * * * *             | 5      | 15.5    | * * * *                 |
| 13     | 0.656   | * * * * * *             | 43     | 15.5    | * * * *                 |
| 43     | 0.655   | * * * * * *             | 29     | 15.5    | * * * *                 |
| 5      | 0.653   | * * * * * *             | 47     | 15.5    | * * * *                 |
| 34     | 0.642   | * * * * * *             | 40     | 15.1    | * * * *                 |
| 9      | 0.637   | * * * * * *             | 10     | 14.9    | * * * *                 |
| 10     | 0.619   | * * * * *               | 28     | 14.8    | * * * *                 |
| 15     | 0.609   | * * * *                 | 41     | 14.5    | * *                     |
| 41     | 0.549   | * *                     | 7      | 14.5    | * *                     |
| 45     | 0.538   | *                       | 15     | 14.2    | *                       |
| 37     | 0.436   | *                       | 37     | 13.4    | *                       |

**Figure S3.** Five-year dynamics of ring width (RW) and latewood proportion (LWP).

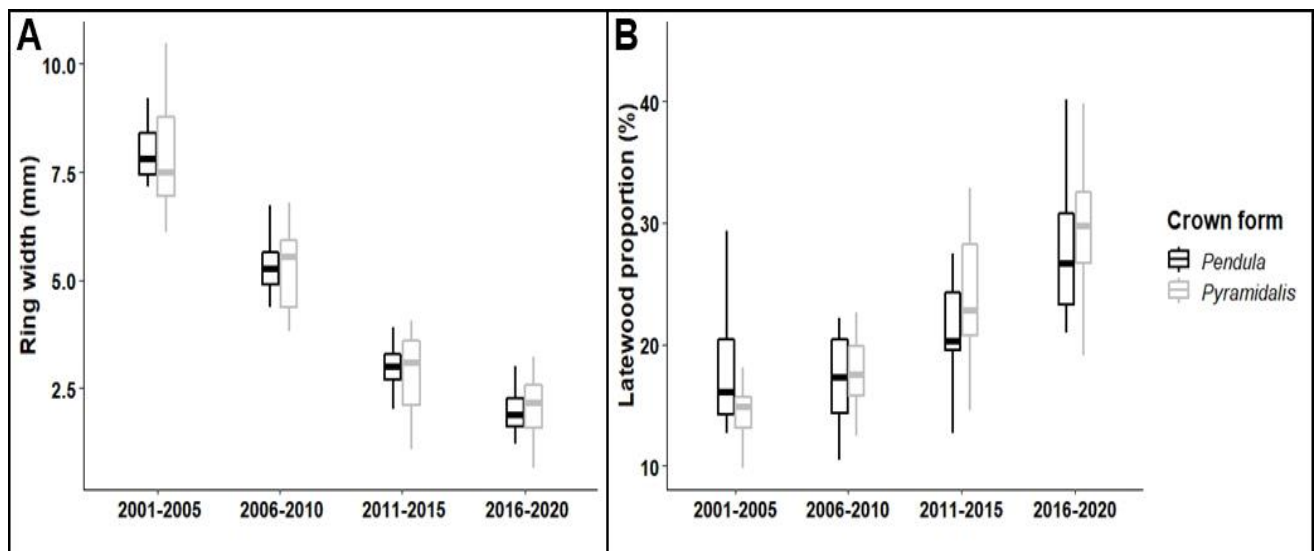

Figure S4. Monthly SPI index of the 2011-2012 drought period.

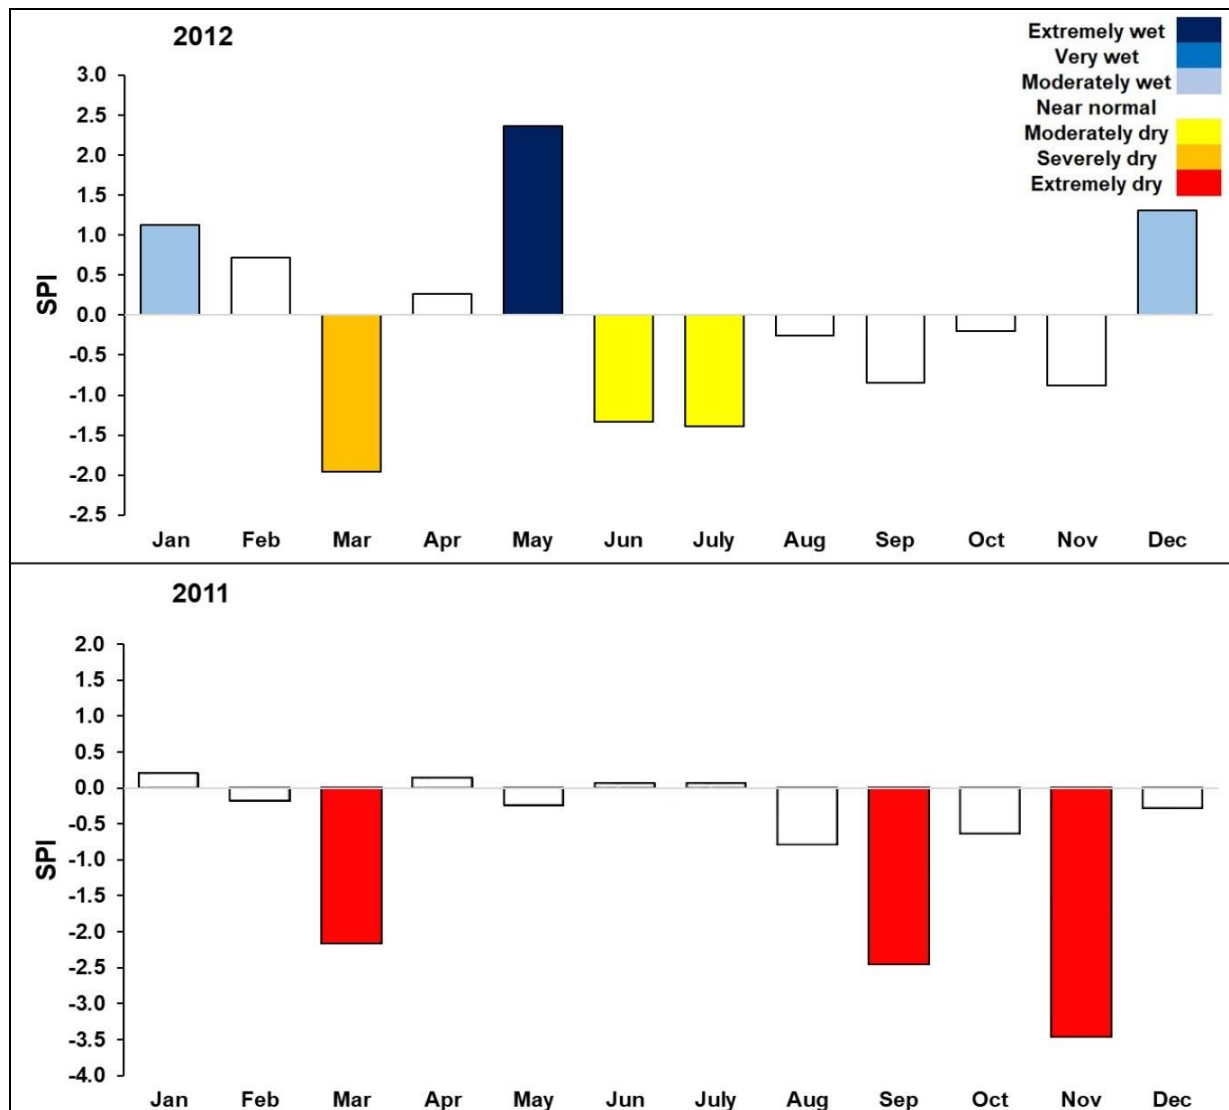

**Figure S5.** Resistance, recovery, and resilience of the two crown forms in each provenance.

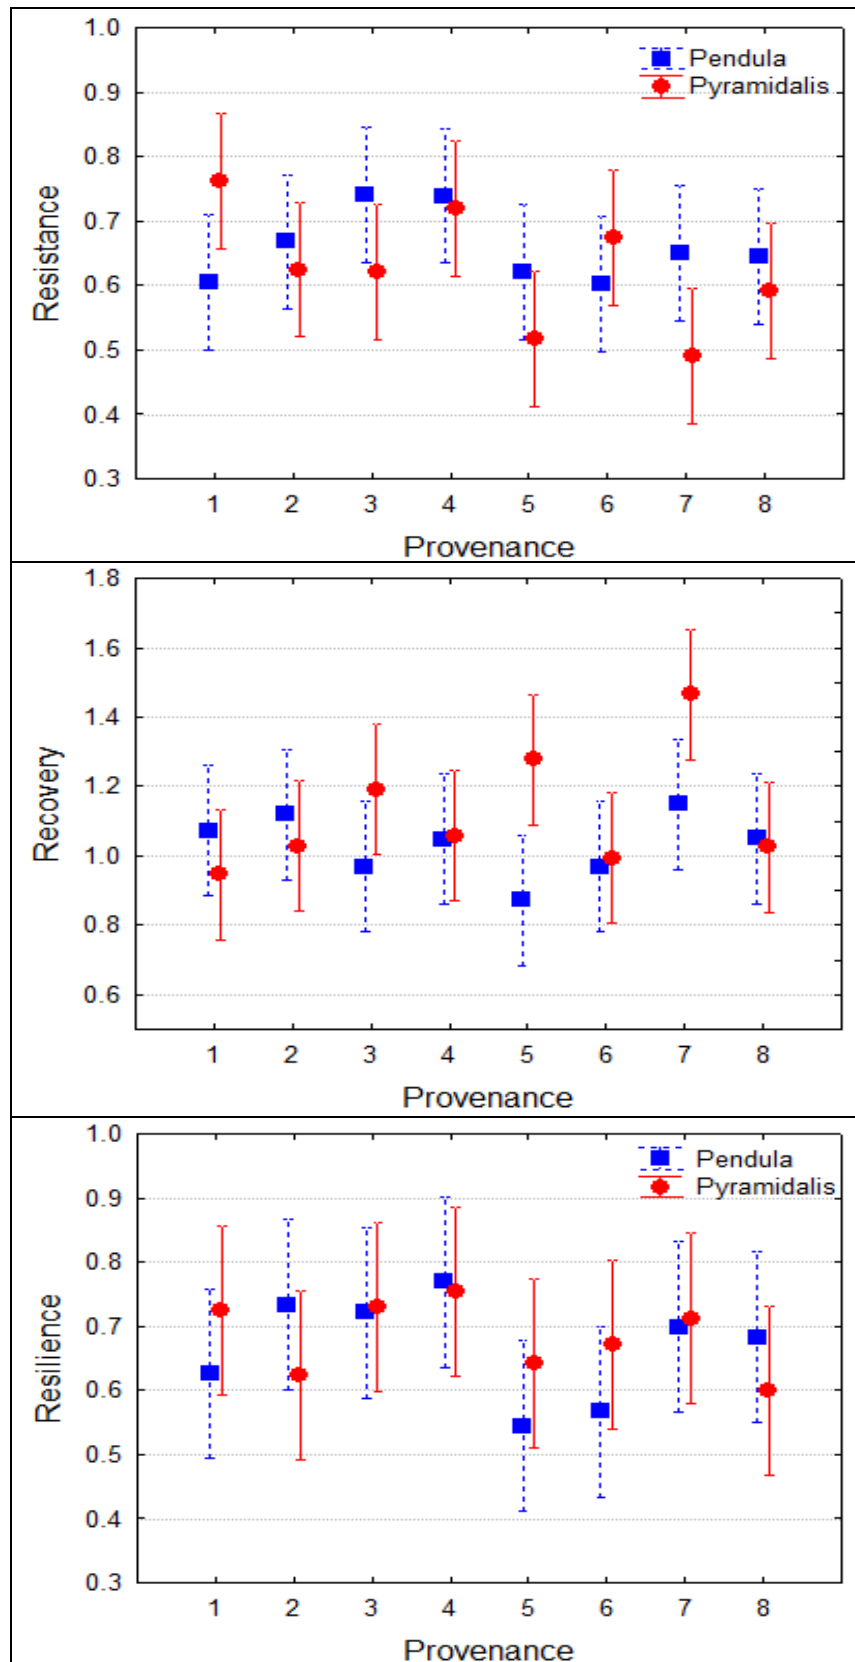

Supplement: s1 [file s1]
