# Supplementary material for: Phenotypic Variability and Differences in the Drought Response of Norway Spruce Pendula and Pyramidalis Half-Sib Families
Source: MDPI journal article supplement (doi:10.3390/f12070947), 2021-07-19
Supplement: s1 [file s1]

Archive with 1 entries (1 files):
- forests-1279107-supplementary.pdf
